# Supplementary material
Source: Springer Nature journal article supplement (https://www.springermedizin.de/resource/supplementary/13058_2004_1024_MOESM4_ESM.pdf/9698166)

# Mouse #56

Day 0

Week 1

Week 2

Week 3

Week 4

Week 5

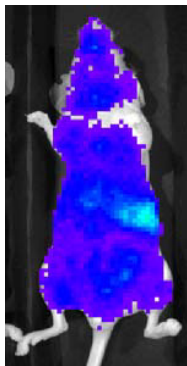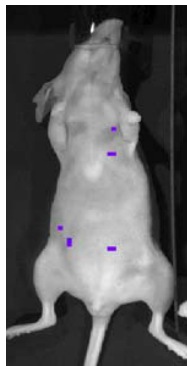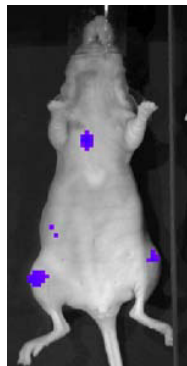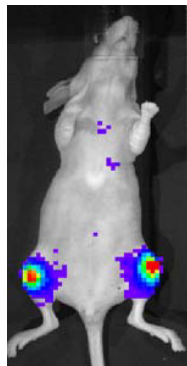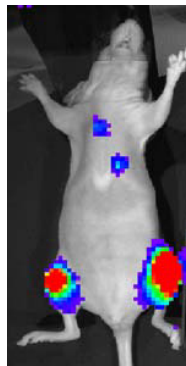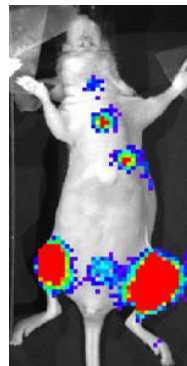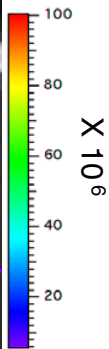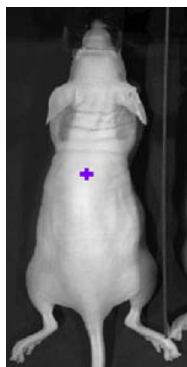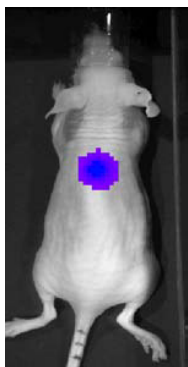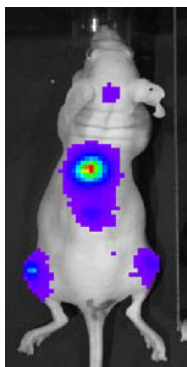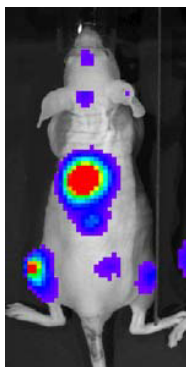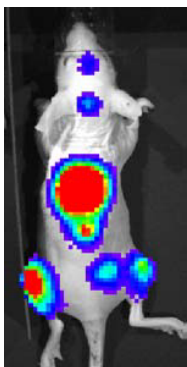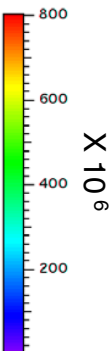

Supplement: MOESM4 [file 9698166]
